# Supplementary material
Source: publisher figshare collection journal article supplement (https://acs.figshare.com/ndownloader/files/3875938)
Supplement: Supplementary file 1 [file 3875938]

## Supplementary Information

### Changes in Dissolved Organic Matter during the Treatment Processes of a Drinking Water Plant in Sweden and Formation of Previously Unknown Disinfection Byproducts

*Michael Gonsior<sup>a\*</sup>, Philippe Schmitt-Kopplin<sup>b,c</sup>, Helena Stavklint<sup>d</sup>, Susan D. Richardson<sup>e</sup>,*

*Norbert Hertkorn<sup>b</sup> and David Bastviken<sup>f</sup>*

<sup>a</sup> Chesapeake Biological Laboratory , University of Maryland Center for Environmental Science, Solomons, USA

<sup>b</sup> Helmholtz Zentrum München, Analytical BioGeoChemistry, Neuherberg, Germany

<sup>c</sup> Technische Universität München, Analytical Food Chemistry, D-85354 Freising-Weihenstephan, Germany

<sup>d</sup> Tekniska verken i Linköping AB, Sweden

<sup>e</sup> University of South Carolina, Department of Chemistry and Biochemistry, Columbia, SC, USA

<sup>f</sup> Linköping University, Department of Thematic Studies – Environmental Change, Linköping, Sweden

\*Corresponding author. phone: +14103267245, fax: +14103267302, Email address:

[gonsior@umces.edu](mailto:gonsior@umces.edu)

#### Summary

|           |         |
|-----------|---------|
| Table S1  | Page S2 |
| Table S2  | Page S3 |
| Table S3  | Page S4 |
| Figure S1 | Page S5 |
| Figure S2 | Page S6 |

| spectrum                                             | Figure | NS          | AQ [s] | D1 [s] | WDW2 | PR2    |
|------------------------------------------------------|--------|-------------|--------|--------|------|--------|
| <sup>1</sup> H NMR<br>before / after Cl              | 6      | 512         | 5      | 5      | EM   | 1      |
| <sup>13</sup> C NMR<br>before / after Cl             | S2     | 9361 / 9456 | 1      | 19     | EM   | 35 (2) |
| DEPT 45/135 <sup>13</sup> C NMR<br>before / after Cl | S2     | 16384       | 1      | 2      | EM   | 12.5   |
| DEPT 90 <sup>13</sup> C NMR<br>before / after Cl     | S2     | 32768       | 1      | 2      | EM   | 12.5   |

**Table S1:** Acquisition parameters of NMR spectra, shown according to figures. NS: number of scans (for 2D NMR: F2); AQ: acquisition time [ms]; D1: relaxation delay [ms]; NE: number of F1 increments in 2D NMR spectra; WDW1, WDW2: apodization functions in F1/ F2 (EM: line broadening factor [Hz]; PR2: coefficients used for windowing functions WDW2.

| $\delta(^1\text{H})$ [ppm] | 10 - 7.0               | 7.0 - 5.3                              | 4.9 - 3.1   | 3.1 - 1.9                    | 1.9 - 0.0       | H <sub>olefinic</sub> /<br>H <sub>aromatic</sub> | 10 - 5.3<br>( <u>H</u> C <sub>sp</sub> <sup>2</sup> ) |
|----------------------------|------------------------|----------------------------------------|-------------|------------------------------|-----------------|--------------------------------------------------|-------------------------------------------------------|
| key substructures          | <u>H</u> <sub>ar</sub> | <u>H</u> C=C, <u>H</u> CO <sub>2</sub> | <u>H</u> CO | <u>H</u> C-N, <u>H</u> C-C-X | <u>H</u> C-C-C- |                                                  |                                                       |
| before Cl                  | 2.4                    | 2.1                                    | 19.2        | 28.7                         | 47.6            | 0.9                                              | 4.5                                                   |
| after Cl                   | 3.0                    | 2.7                                    | 19.3        | 29.1                         | 46.0            | 0.9                                              | 5.7                                                   |

**Table S2:** <sup>1</sup>H NMR section integrals (percent of non-exchangeable protons) and key substructures of DOM before and after chlorination.

| $\delta(^{13}\text{C})$ ppm | 220-187     | 187-167               | 167-145                   | 145-108                                                                                                                  | 108-90                    | 90-47        | 47-0                                                                                | H/C ratio                                                                           | O/C ratio |
|-----------------------------|-------------|-----------------------|---------------------------|--------------------------------------------------------------------------------------------------------------------------|---------------------------|--------------|-------------------------------------------------------------------------------------|-------------------------------------------------------------------------------------|-----------|
| Key substructures           | <u>C</u> =O | <u>C</u> OX           | <u>C</u> <sub>ar</sub> -O | <u>C</u> <sub>ar</sub> -C,H                                                                                              | O <sub>2</sub> <u>C</u> H | O <u>C</u> H | C <u>C</u> H                                                                        |                                                                                     |           |
| before chlorination         | 1.8         | 9.8                   | 3.9                       | 8.4                                                                                                                      | 5.6                       | 33.7         | 36.8                                                                                | 1.31                                                                                | 0.70      |
| after chlorination          | 1.7         | 9.1                   | 3.8                       | 10.8                                                                                                                     | 5.6                       | 32.1         | 35.5                                                                                | 1.28                                                                                | 0.67      |
| NMR mixing model            | C=O         | COOH                  | C <sub>ar</sub> -O        | C <sub>ar</sub> -H                                                                                                       | O <sub>2</sub> CH         | OCH          | CH <sub>2</sub>                                                                     |                                                                                     |           |
| H/C ratio                   | 0           | 1                     | 0                         | 1                                                                                                                        | 1                         | 1            | 2                                                                                   |                                                                                     |           |
| O/C ratio                   | 1           | 2                     | 1                         | 0                                                                                                                        | 2                         | 1            | 0                                                                                   |                                                                                     |           |
| DOM (depth)                 | CH total    | CH <sub>2</sub> total | CH <sub>3</sub> total     | ratio (d <sub>1</sub> / c <sub>1</sub> / b <sub>1</sub> / a <sub>1</sub> )<br>HC <sub>ar</sub> -C / O-HC-O / HC-O / HC-C |                           |              | ratio (b <sub>2</sub> / a <sub>2</sub> )<br>H <sub>2</sub> C-O / H <sub>2</sub> C-C | ratio (b <sub>3</sub> / a <sub>3</sub> )<br>H <sub>3</sub> C-O / H <sub>3</sub> C-C |           |
| before chlorination         | 36          | 30                    | 34                        | 15.9 / 1.0 / 33.9 / 49.1                                                                                                 |                           |              | 6.8 / 93.2                                                                          | 9.1 / 90.9                                                                          |           |
| after chlorination          | 35          | 33                    | 32                        | 14.8 / 1.4 / 34.5 / 49.3                                                                                                 |                           |              | 10.7 / 89.3                                                                         | 5.7 / 94.3*                                                                         |           |

**Table S3.** (Top):  $^{13}\text{C}$  NMR section integrals (percent of total carbon) and key substructures of DOM before and after chlorination. Middle: Substructures used for NMR-derived reverse mixing model with nominal H/C and O/C ratios given. Bottom: percentage of methin, methylene and methyl carbon related to total protonated  $^{13}\text{C}$  NMR integral as derived from  $^{13}\text{C}$  DEPT NMR spectra of DOM according to carbon multiplicity (left 3 columns) and relative proportions of these  $\text{CH}_n$  units binding to oxygen versus carbon chemical environments.

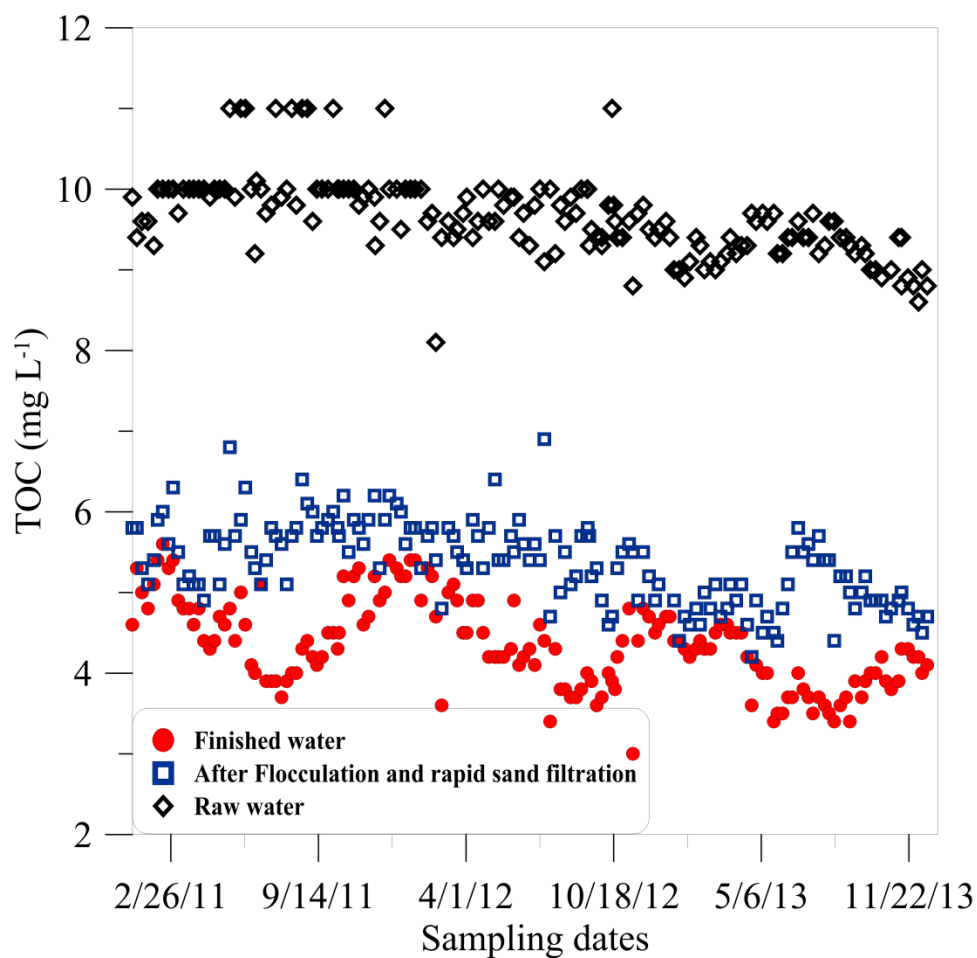

**Figure S1:** Total organic carbon concentration of the raw water, after flocculation/rapid sand filtration, and of the processed water, Råberga drinking water treatment plant, Linköping, Sweden.

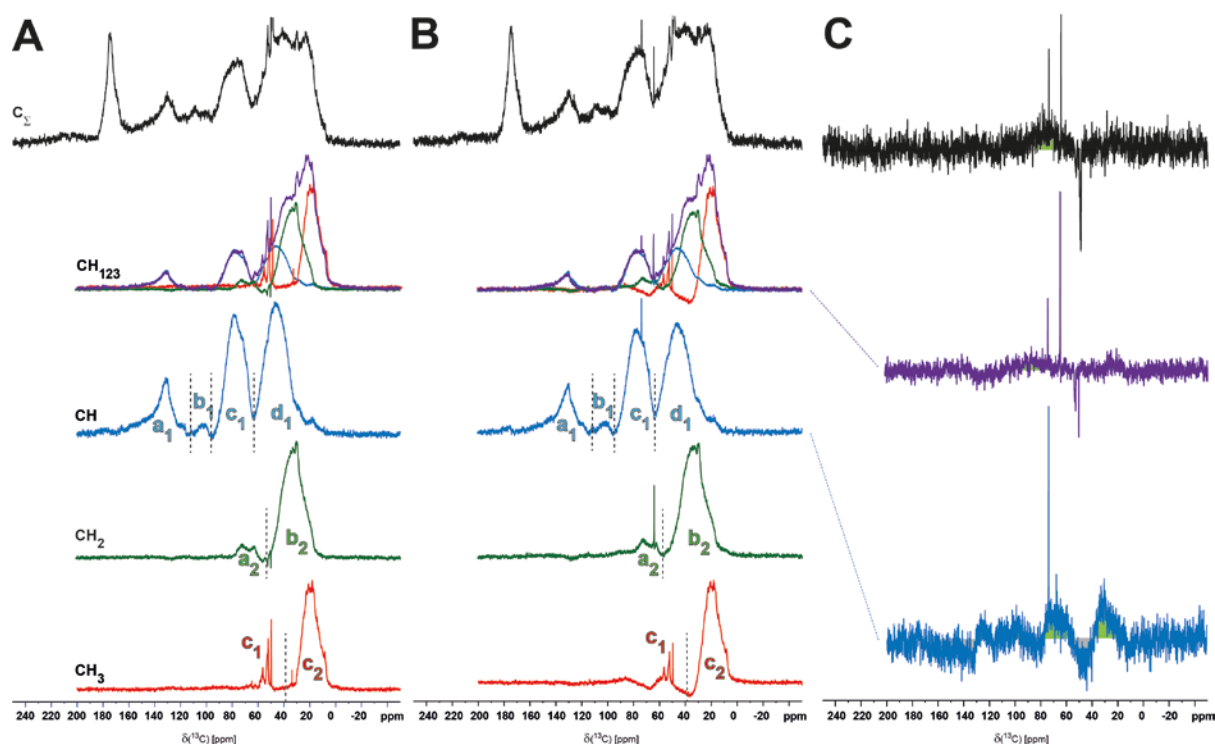

**Figure S2:**  $^{13}\text{C}$  NMR spectra of Raberga slow sand SPE-DOM ( $^{12}\text{CD}_3\text{OD}$  solution,  $B_0 = 11.7\text{ T}$ ) obtained by solid phase extraction (PPL) before (A) and after (B) chlorination;  $^{13}\text{C}$  DEPT NMR spectra: (top) superimposed protonated carbon NMR resonances ( $\text{CH}_{123}$ ; DEPT-45  $^{13}\text{C}$  NMR spectra), multiplicity-edited  $^{13}\text{C}$  NMR spectra are (second from top) CH; methine, with indices  $a_1$ - $d_1$  denoting following chemical environments:  $\text{HC}_{\text{ar}}\text{-C}$  /  $\text{O-HC-O}$  /  $\text{HC-O}$  /  $\text{HC-C}$ ), (second from bottom)  $\text{CH}_2$ ; methylene, with indices  $a_2$  and  $b_2$  denoting following chemical environments:  $\text{H}_2\text{C-O}$  /  $\text{H}_2\text{C-C}$ , and (bottom)  $\text{CH}_3$ ; methyl, with indices  $a_3$  and  $b_3$  denoting following chemical environments:  $\text{H}_3\text{C-O}$  /  $\text{H}_3\text{C-C}$ . The respective  $^{13}\text{C}$  NMR section integrals are provided in Tab. 4. (C) difference  $^{13}\text{C}$  NMR spectra as derived from (top) single pulse  $^{13}\text{C}$  NMR spectra, (middle) DEPT-45  $^{13}\text{C}$  NMR spectra, and (bottom) DEPT-90  $^{13}\text{C}$  NMR spectra.
